# Supplementary material for: Self-passivation hole-transporting materials with pyridine-containing cores for antimony chalcogenide solar cells studied under dopant-free conditions
Source: Royal Society of Chemistry journal article supplement (doi:10.1039/d2se01448c), 2022-11-22
Supplement: d2se01448c1.pdf [file d2se01448c1.pdf]

**Electronic Supplementary Information**

**Self-Passivation Hole-Transporting Materials with Pyridine-Contained Core for  
Antimony Chalcogenide Solar Cells Studied under Dopant-free Conditions**

Shuangting Xu, Jing Wu, Fuling Guo\*, Miaomiao Wu, Sijian Chen, Wangchao Chen,  
Chengwu Shi,

*School of Chemistry and Chemical Engineering, Hefei University of Technology, Hefei, Anhui,*

*230009, PR China*

## Experimental

### Materials and Characterization

All the reagents and solvent were obtained from Sinopharm Group and used without further purification unless mentioned. The 1,4-dibromonaphthalene, 5,8-dibromoquinoline, 5,8-dibromoisquinoline, (4-(bis(4-methoxyphenyl)amino)phenyl)boronic acid, Potassium antimony (III) L(+)- tartrate hemihydrate ( $C_4H_4KO_7Sb \cdot 0.5H_2O$ ), and sodium thiosulfate pentahydrate ( $Na_2S_2O_3 \cdot 5H_2O$ ) were purchased from Innochem Science & Technology co., Ltd, Beijing. The selenourea ( $CH_4N_2Se$ ) were got from TCI(Shanghai)Development Co., Ltd. The Cadmium(II) nitrate ( $Cd(NO_3)_2$ ), Chromium(II) chloride ( $CdCl_2$ ), thiourea and ammonia were obtained from Shanghai Aladdin Biochemical Technology Co., Ltd. The fluorine tin oxide conductive glasses (FTO, transmission >90%, 12~14  $\Omega$  per square) were obtained from TEC 15, U.S.A.). the indium-tin oxide conductive glasses (ITO, transmission >90%, 8~9  $\Omega$  per square) were obtained from GeAoChem China). The  $^1H$  NMR and  $^{13}C$  NMR spectra were measured on the 400 MHz Bruker spectrometer. The UV-vis spectra were tested on U3900H UV-vis spectrophotometer. The HR-MS-ESI was measured on Vanquish Q Exactive Plus (Thermo Fisher Scientific, Germany), The CV measurement (cyclic voltammetry) was recorded by a CHI660d electrochemical analyzer through a standard three-electrode cell with a glassy carbon electrode as working electrode, a Pt wire as counter electrode, and a saturated calomel electrode (SCE) as reference electrode, the ferrocene ( $Fc/Fc^+$ ) as external reference (*vs.*  $Fc/Fc^+$  +0.63 V *vs.* NHE +4.44 eV).<sup>S1,S2</sup>

### Synthesis details for NP-OMeTPA, QL-OMeTPA and *i*-QL-OMeTPA

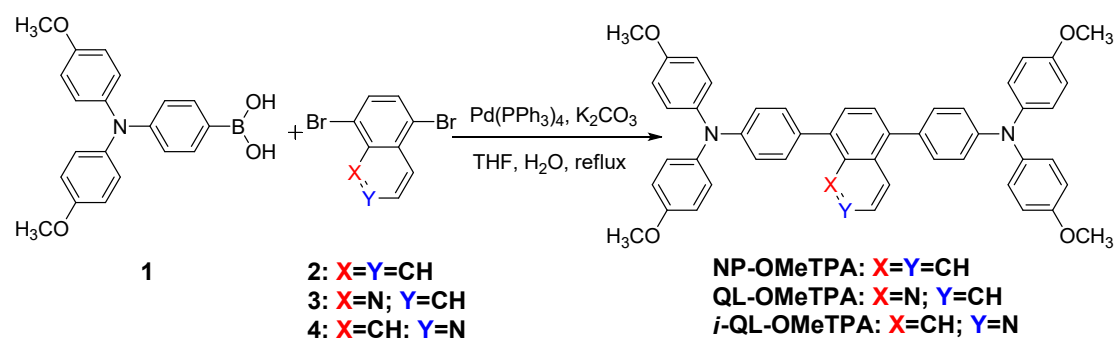

#### Scheme S1. Synthetic Route for NP-OMeTPA, QL-OMeTPA and *i*-QL-OMeTPA

*Synthesis of 4,4'-(naphthalene-1,4-diyl)bis(N,N-bis(4-methoxyphenyl)aniline) (NP-OMeTPA)*: A 50 mL flask with 4-(bis(4-methoxyphenyl)amino)phenylboronic acid (**1**) (366mg, 1.05mmol), 1,4-dibromonaphthalene (**2**) (100mg, 0.35mmol), Pd(PPh<sub>3</sub>)<sub>4</sub> (0.016 mmol, 20 mg) and 0.5ml saturated K<sub>2</sub>CO<sub>3</sub> aqueous solution in 30ml Tetrahydrofuran (THF) was stirred and reflux for 18 h under N<sub>2</sub> atmosphere. After cooling down to room temperature, the mixture was filtered and extracted with CH<sub>2</sub>Cl<sub>2</sub> for three times. The organic layers were collected and dried to solid powder. The purified product was obtained by column chromatography on silica gel using CH<sub>2</sub>Cl<sub>2</sub>/PE(Petroleum ether) (1/2, v/v) as eluent to yield a faintly yellow powder (160mg, 62%). <sup>1</sup>H NMR (400 MHz, CDCl<sub>3</sub>) δ 8.11 (m, 2H), 7.47 (m, 4H), 7.36 (d, *J* = 8.6 Hz, 4H), 7.20-7.17 (m, 8H), 7.07 (m, 4H), 6.92-6.88 (m, 8H), 3.84 (s, 12H). <sup>13</sup>C NMR (100 MHz, CDCl<sub>3</sub>) δ 155.95, 147.96, 141.00, 139.26, 135.78, 132.70, 132.14, 130.69, 127.14, 126.78, 126.56, 126.45, 120.02, 114.78, 114.74, 55.52. HRMS (EIS-TOF, m/z): [M+H] calcd for (C<sub>50</sub>H<sub>42</sub>N<sub>2</sub>O<sub>4</sub>), 735.3223, found 735.3173.

*Synthesis of 4,4'-(quinoline-5,8-diyl)bis(N,N-bis(4-methoxyphenyl)aniline) (QL-OMeTPA)*: The synthetic method of product **QL-OMeTPA** was similar to **NP-**

**OMeTPA**, with 5,8-dibromoquinoline (**3**) (100mg, 0.35mmol) replacing 1,4-dibromonaphthalene (**2**). The product was obtained by column chromatography using eluent CH<sub>2</sub>Cl<sub>2</sub>/PE (2/1, v/v) to afford a canary yellow powder (133mg, 52%). <sup>1</sup>H NMR (400 MHz, CDCl<sub>3</sub>) δ 8.97 (dd, *J* = 4.0, 1.6 Hz, 1H), 8.43 (dd, *J* = 8.6, 1.6 Hz, 1H), 7.76 (d, *J* = 7.5 Hz, 1H), 7.61 (d, *J* = 8.6 Hz, 2H), 7.55 (d, *J* = 7.4 Hz, 1H), 7.38 (dd, *J* = 8.5, 4.1 Hz, 1H), 7.32 (d, *J* = 8.6 Hz, 2H), 7.22-7.14 (m, 8H), 7.06 (d, *J* = 8.3 Hz, 4H), 6.93-6.86 (m, 8H), 3.84 (s, 12H). <sup>13</sup>C NMR (100 MHz, CDCl<sub>3</sub>) δ 156.09, 155.88, 149.60, 148.33, 147.93, 146.33, 141.03, 140.78, 139.27, 134.79, 131.48, 131.26, 131.16, 130.65, 129.47, 127.27, 126.91, 120.55, 119.86, 119.68, 114.82, 114.69, 55.52. HRMS (EIS-TOF, m/z): [M+H] calcd for (C<sub>49</sub>H<sub>42</sub>N<sub>3</sub>O<sub>4</sub>) 736.3175, found 736.3149.

*Synthesis of 4,4'-(isoquinoline-5,8-diyl)bis(N,N-bis(4-methoxyphenyl)aniline) (i-QL-OMeTPA)*: The synthetic method of product **i-QL-OMeTPA** was resembled that of **NP-OMeTPA**, with 5,8-dibromoisoquinoline (**4**) (100mg, 0.35mmol) replacing 1,4-dibromonaphthalene (**2**). The product was obtained by column chromatography using eluent CH<sub>2</sub>Cl<sub>2</sub>/PE (4/1, v/v) to afford a light yellow powder (92.3mg, 36%). <sup>1</sup>H NMR (400 MHz, CDCl<sub>3</sub>) δ 9.47 (s, 1H), 8.51 (d, *J* = 6.0 Hz, 1H), 7.90 (d, *J* = 6.0 Hz, 1H), 7.67 (d, *J* = 7.4 Hz, 1H), 7.56 (d, *J* = 7.4 Hz, 1H), 7.40-7.31 (m, 4H), 7.23-7.15 (m, 8H), 7.12-7.03 (m, 4H), 6.94-6.87 (m, 8H), 3.84 (s, 12H). <sup>13</sup>C NMR (100 MHz, CDCl<sub>3</sub>) δ 156.12, 151.70, 148.59, 148.44, 142.82, 140.74, 139.87, 137.91, 134.72, 130.77, 130.70, 130.52, 130.31, 127.60, 127.14, 126.94, 126.92, 119.90, 119.86, 118.79, 114.83, 55.52. HRMS (EIS-TOF, m/z): [M+H] calcd for (C<sub>49</sub>H<sub>42</sub>N<sub>3</sub>O<sub>4</sub>) 736.3175, found 736.3147.

## **Device Fabrication**

The  $\text{Sb}_2(\text{S,Se})_3$  solar cells were fabricated following the previous report.<sup>S3</sup> The  $\text{Sb}_2(\text{S,Se})_3$  film was deposited through the hydrothermal method using  $\text{C}_4\text{H}_4\text{KO}_7\text{Sb}\cdot 0.5\text{H}_2\text{O}$  as Sb-source,  $\text{Na}_2\text{S}_2\text{O}_3$  as S-source and  $\text{CH}_4\text{N}_2\text{Se}$  as Se-source on FTO conductive glass deposited CdS layer to form the FTO/CdS/ $\text{Sb}_2(\text{S,Se})_3$  framework.<sup>S4</sup> After the fabrication, the HTMs layers were spin-coated upon the  $\text{Sb}_2(\text{S,Se})_3$  film at 3000 rpm for 30 s with 5mg/mL in chlorobenzene, then annealing at 105 °C for 10 min, followed by the thermal evaporation technology of Au counter electrode at high-vacuum. The active area of the solar cells was defined as 0.09 cm<sup>2</sup>.

## **Device Characterizations**

The J-V curves of these solar cells employed using Newport 3A solar simulator. The parameters were obtained with Keithley model 2400 digital source meter. The EQE spectra were measured by Newport IPCE/QE test system. The electrical impedance spectroscopy (EIS) measurements were carried out on CHI660d electrochemical analyzer, with 0.6V voltage bias and frequency from 100 mHz to 1000 kHz, fitted with Z-View software. The time-resolved photoluminescence measurements (TR-PL) with FTO/CdS/ $\text{Sb}_2(\text{S,Se})_3$ /HTM structure were carried out on a LaserStrobe Time-Resolved Spectrofluorometer (Photon Technology International (Canada) Inc.) with a USHIO xenon lamp source, a GL-302 high-resolution dye laser (lifetimes 100 ps to 50 ms, excited by a Nitrogen laser) and a 914 photomultiplier detection system.

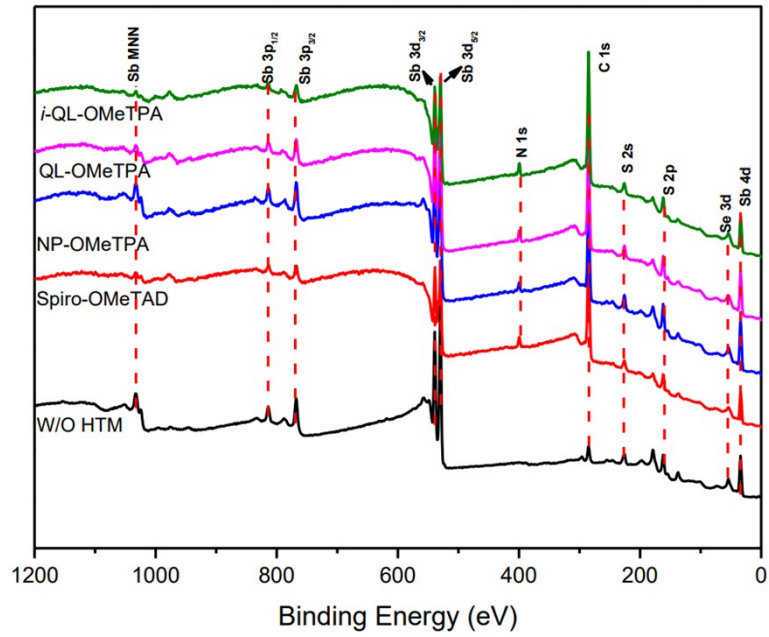

Fig. S1 The total XPS spectra of the pristine  $\text{Sb}_2(\text{S,Se})_3$  and  $\text{Sb}_2(\text{S,Se})_3$  with these HTMs

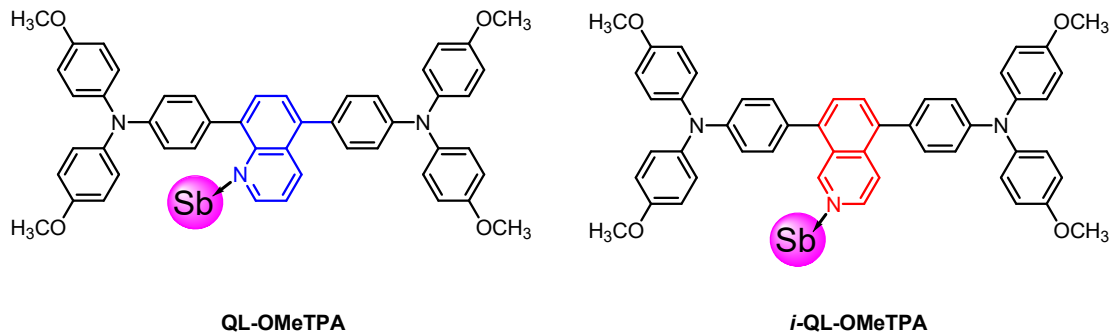

Fig. S2 Schematic illustration of the coordination effect for pyridine moieties with Sb atoms.

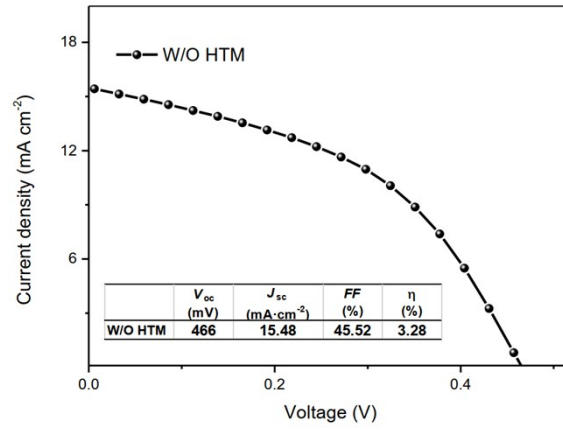

Fig. S3 the J-V curves of the champion solar cells based on  $Sb_2(S,Se)_3$  film without HTMs, with an inset table showing the detail parameters.

Table S1 the average paraments of solar cells with NP-OMeTPA, QL-OMeTPA and *i*-QL-OMeTPA as HTMs compared with Spiro-OMeTAD under dopant-free conditions.

| HTMs                | $V_{oc}$ (mV) | $J_{sc}$<br>(mA cm <sup>-2</sup> ) | $FF$<br>(%) | $\eta$<br>(%) |
|---------------------|---------------|------------------------------------|-------------|---------------|
| NP-OMeTPA           | 620±12        | 16.53±0.45                         | 48.38±2.92  | 4.95±0.22     |
| QL-OMeTPA           | 629±10        | 15.70±0.23                         | 50.41±1.57  | 5.07±0.39     |
| <i>i</i> -QL-OMeTPA | 621±11        | 15.51±0.33                         | 43.78±1.88  | 4.22±0.14     |
| Spiro-OMeTAD        | 618±16        | 15.53±0.65                         | 52.06±1.38  | 4.99±0.32     |

Based on 12 cells.

Table S2 the paraments summarized from the EIS and SCLC measurements

| HTMs                | $R_s$<br>( $\Omega$ ) | $R_{rec}$<br>( $\Omega$ ) | Hole Mobility ( $\mu_h$ )<br>(cm <sup>2</sup> V <sup>-1</sup> s <sup>-1</sup> ) |
|---------------------|-----------------------|---------------------------|---------------------------------------------------------------------------------|
| NP-OMeTPA           | 9.87                  | 1731                      | $6.36 \times 10^{-5}$                                                           |
| QL-OMeTPA           | 8.49                  | 3505                      | $5.41 \times 10^{-5}$                                                           |
| <i>i</i> -QL-OMeTPA | 16.64                 | 4052                      | $3.59 \times 10^{-5}$                                                           |
| Spiro-OMeTAD        | 8.00                  | 1608                      | $7.33 \times 10^{-5}$                                                           |



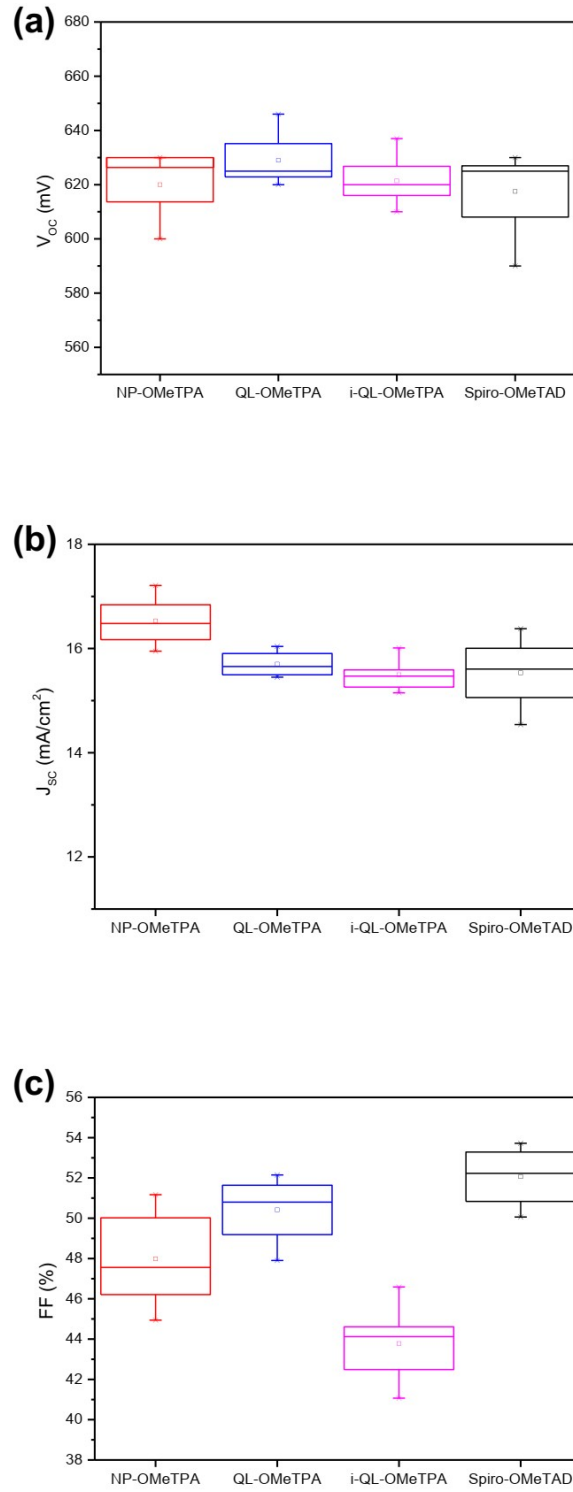

Fig. S4 a) Box plots showing device performance statistical distribution of a)  $V_{oc}$ , b)  $J_{sc}$  and c) FF based on these HTMs summarized from 12 cells.

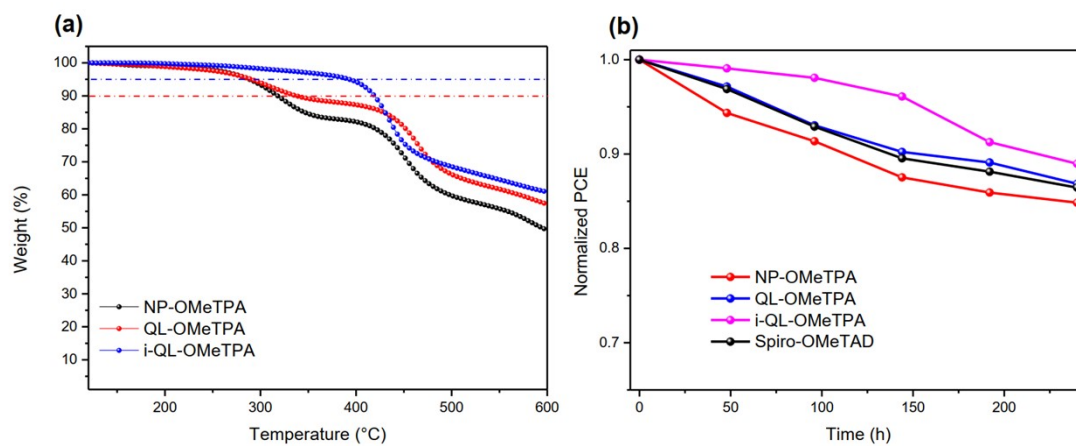

Fig. S5 a) TGA curves of pyridine-contained QL-OMeTPA, *i*-QL-OMeTPA and the reference NP-OMeTPA without pyridine; b) the stability test of  $\text{Sb}_2(\text{S,Se})_3$  solar cells based on these HTMs (storage in ambient air, RT, 35-60% humidity)

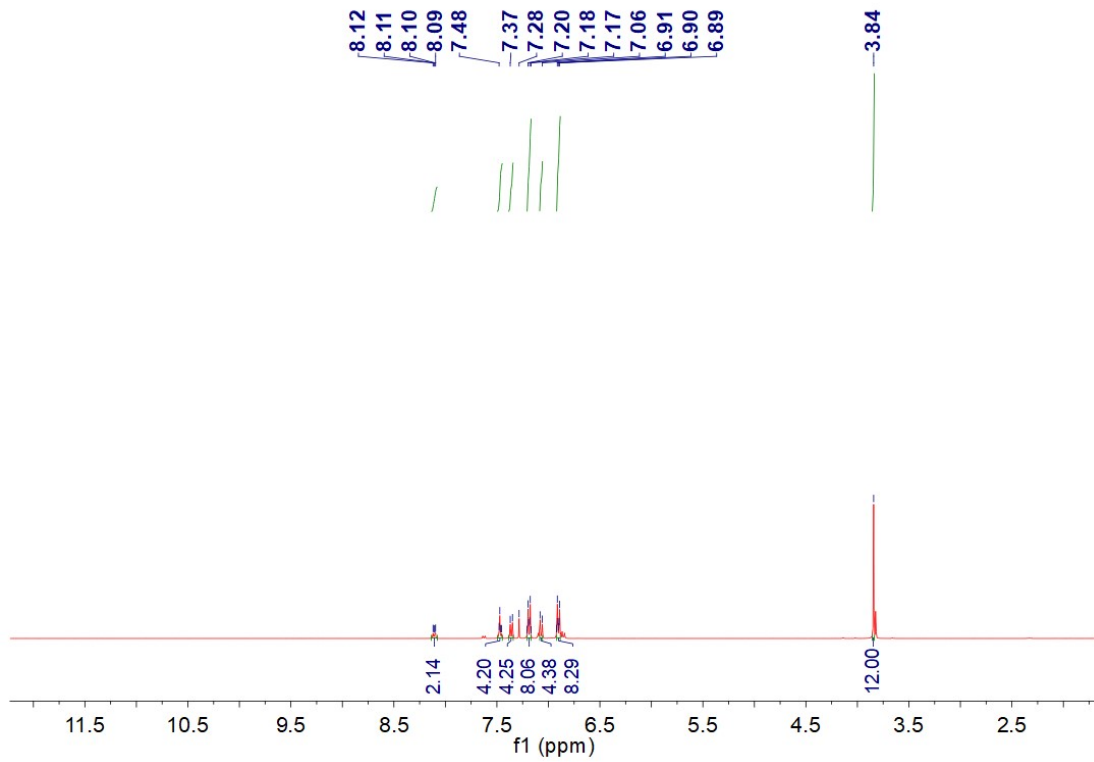

Fig S6. <sup>1</sup>H NMR spectrum of NP-OMeTPA

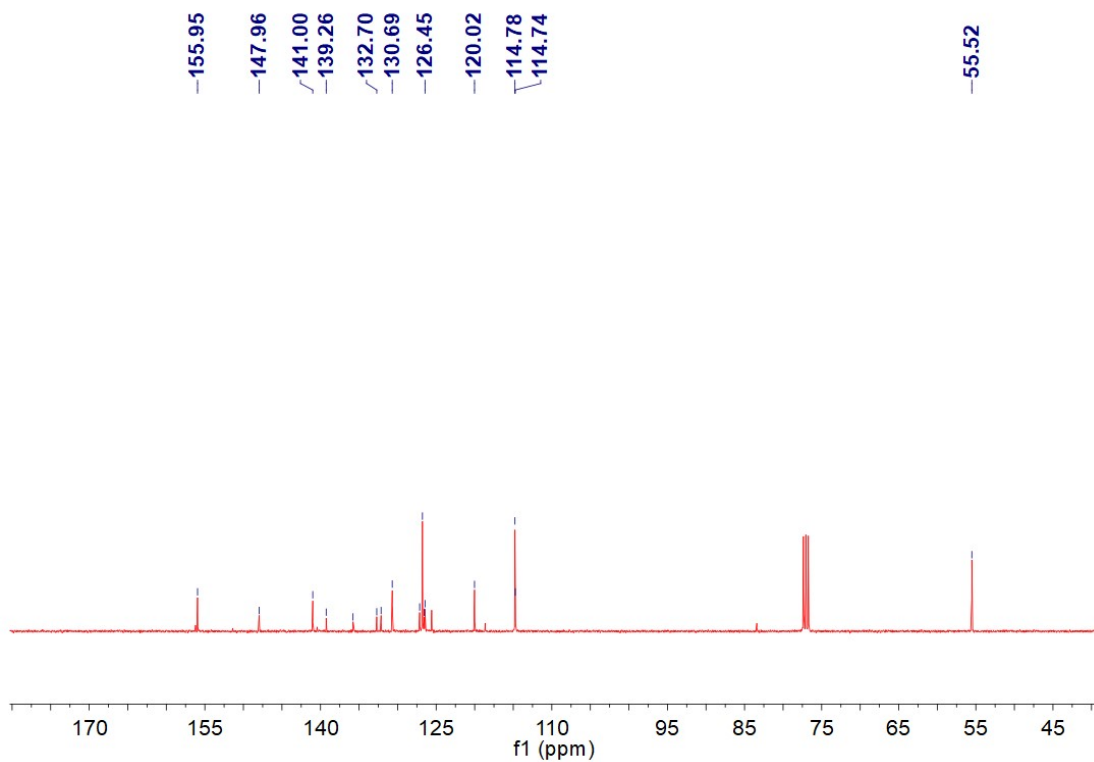

Fig S7. <sup>13</sup>C NMR spectrum of NP-OMeTPA

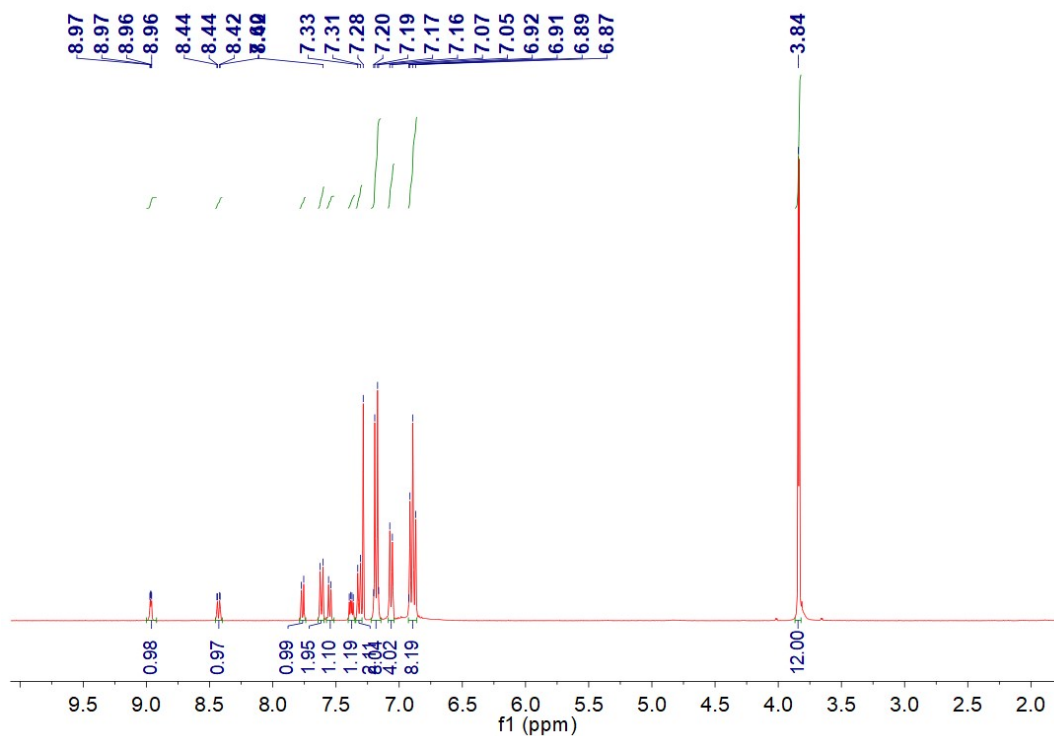

Fig S8.  $^1\text{H}$  NMR spectrum of QL-OMeTPA

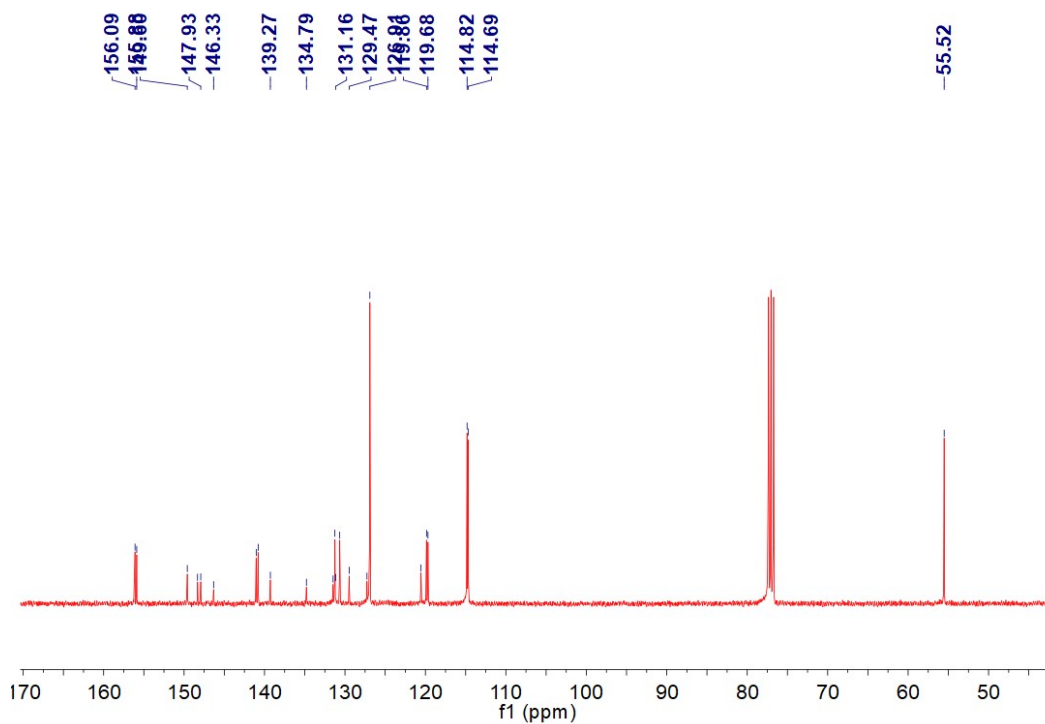

Fig S9.  $^{13}\text{C}$  NMR spectrum of QL-OMeTPA

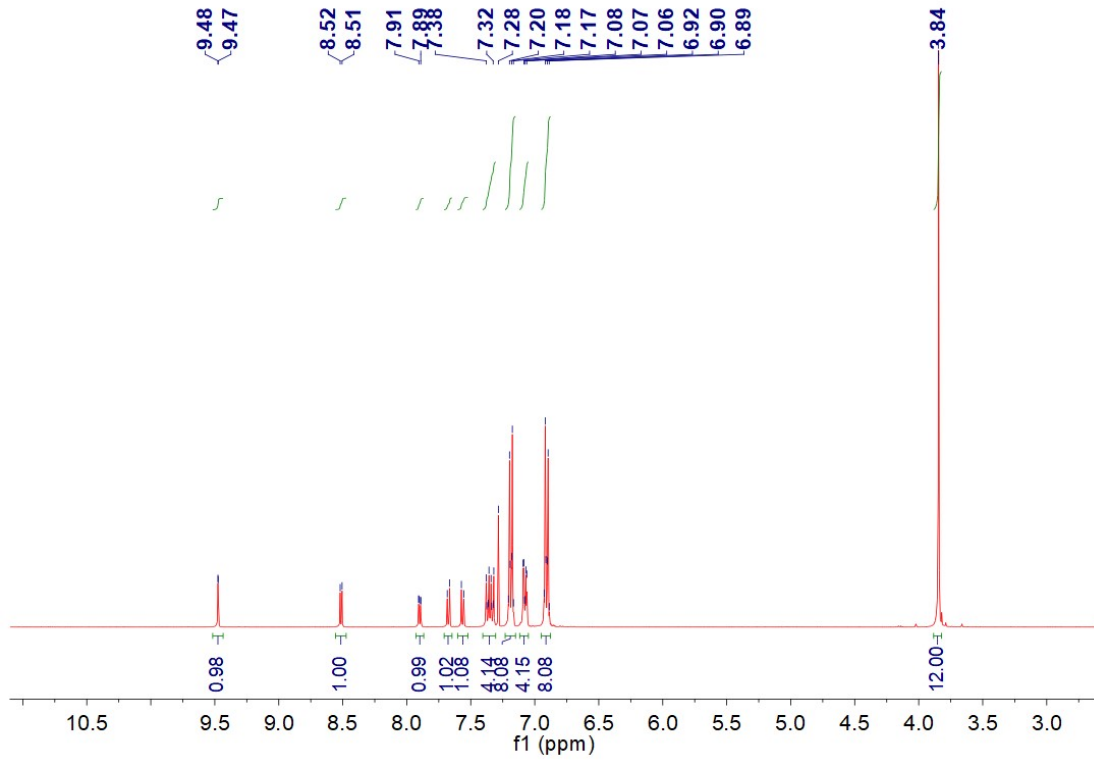

Fig S10.  $^1\text{H}$  NMR spectrum of *i*-QL-OMeTPA

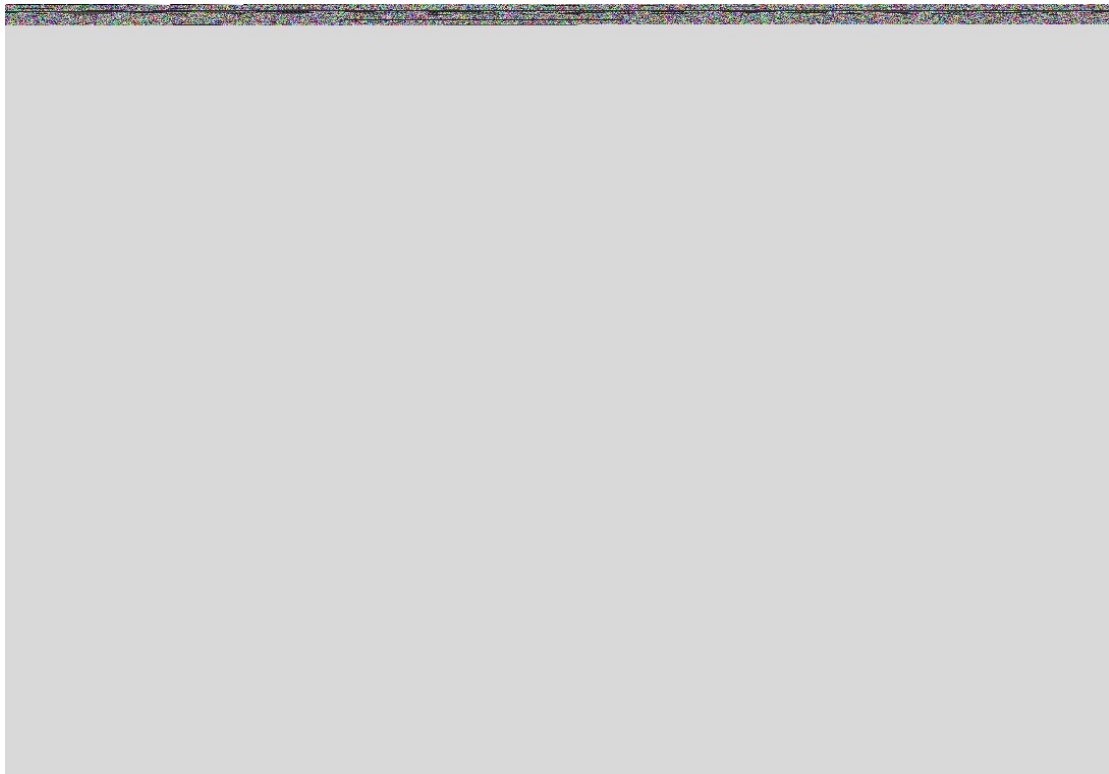

Fig S11.  $^{13}\text{C}$  NMR spectrum of *i*-QL-OMeTPA

## References

- S1 W.C Chen, H.Y. Zhang, J.J. Sun, R. Ghadari, Z.G. Zhang, F. Pan, K. Lv, X. Sun, F.L. Guo, C.W. Shi, *J. Power Sources*, 505 (2021) 230095;
- S2 N.J. Jeon, H.G. Lee, Y.C. Kim, J. Seo, J.H. Noh, J. Lee, S.I. Seok, *J. Am. Chem. Soc.*, 136 (2014) 7837-7840;
- S3 C. Jiang, J. Zhou, R. Tang, W. Lian, X. Wang, X. Lei, H. Zeng, C. Zhu, W. Tang, T. Chen, *Energ. Environ. Sci.*, 14 (2021) 359-364.
- S4 Y. Xiang, H. Guo, Z. Cai, C. Jiang, C. Zhu, Y. Wu, W. H. Zhu, T. Chen, *Chem. Commun.*, 2022, 58, 4787-4790
